# Supplementary material for: Promotion of the start-up of the anammox reactor with exogenous boron
Source: Royal Society of Chemistry journal article supplement (doi:10.1039/d3ew00192j), 2023-01-01
Supplement: d3ew00192j1.pdf [file d3ew00192j1.pdf]

## Supporting Information for

### **Promotion of the start-up of the Anammox reactor with exogenous boron**

Huarong Yu, Ling Zhong, Zhaorui Chu\*, Guirong Wu, Haiyang Yang\*\*, Hongwei  
Rong, Fangshu Qu

*School of Civil Engineering, Guangzhou University, Guangzhou 510006, PR China*

E-mail address: Zhaorui Chu (zrchu@gzhu.edu.cn)

Haiyang Yang (yanghaiyang@gzhu.edu.cn)

(a) eUASB

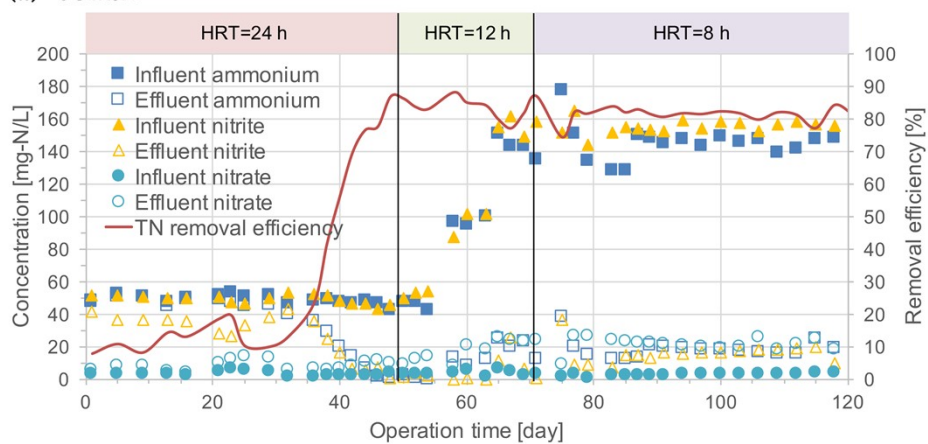

(b) cUASB

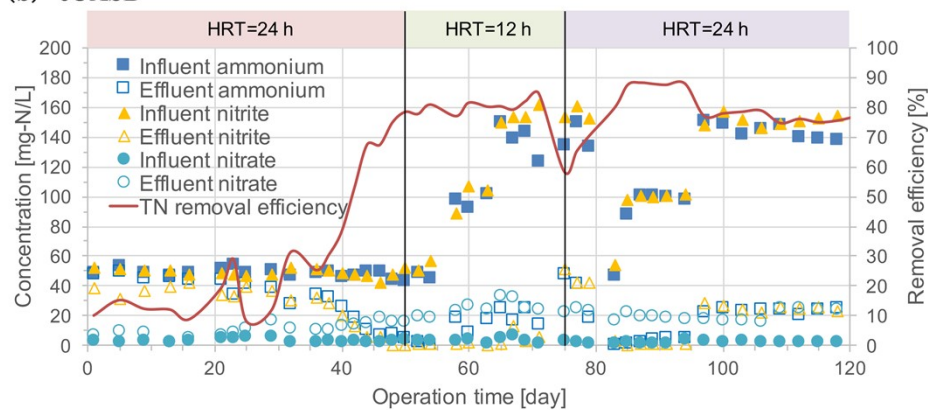

**Figure S1.** Influent and effluent nitrogen concentrations and nitrogen removal efficiency during the long-term operation: (a) e-UASB with  $H_3BO_3$  in the influent, (b) c-UASB without  $H_3BO_3$  in the influent.

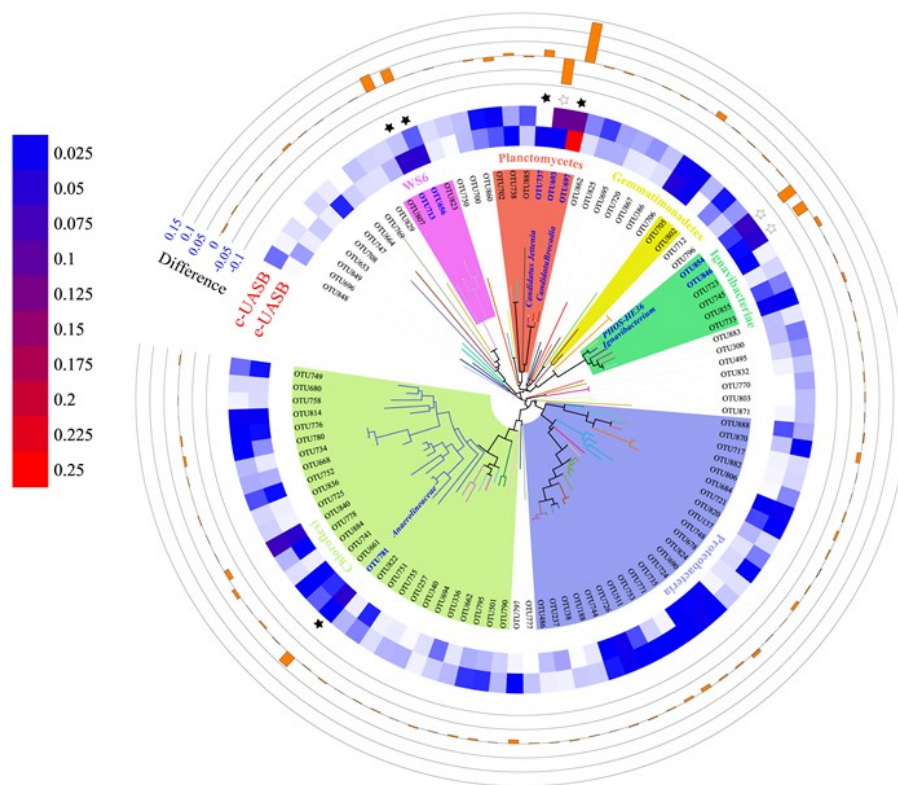

**Figure S2.** The difference analysis of the microbial community in the e-UASB and c-UASB at OTUs level. The top 100 most abundant OTUs are shown.

## Economic analysis for boron dosing strategy

The current price of boric acid is around 0.95 \$/kg. The dosage of the boron in this work was 15 mg/L (for boric acid). Therefore, the extra cost of boron dosing per cubic meter of wastewater treated would be 0.01425 \$/m<sup>3</sup>. This operational cost would be quite competitive, considering the exogenous boron could accelerate the start-up of the Anammox reactor.
